# Supplementary material for: Symptom Recovery in Children Aged 5 to 12 Years With Sport-Related and Non–Sport-Related Concussion
Source: PubMed Central journal article supplement (PMC11618468; doi:10.1001/jamanetworkopen.2024.48797), 2024-12-04
Supplement: jamanetwopen-e2448797-s001.pdf [file jamanetwopen-e2448797-s001.pdf]

## Supplemental Online Content

Ledoux A-A, Sicard V, Bijelic V, et al; Pediatric Emergency Research Canada (PERC) Predicting and Preventing Postconcussive Problems in Pediatrics (5P) Concussion Team. Symptom recovery in children aged 5 to 12 years with sport-related and non-sport-related concussion. *JAMA Netw. Open.* 2024;7(12):e2448797. doi:10.1001/jamanetworkopen.2024.48797

**eTable 1.** Examples of Sport and Non-Sport Activities That Can Lead to Concussions

**eTable 2.** Sport Classification

**eTable 3.** Missing PCSI Outcome at Each Time Point

**eFigure 1.** Participant Inclusion Flowchart

**eTable 4.** Personal Characteristics by Type of Contact/Collision

**eTable 5.** Association Between Symptom Trajectories and Time Stratified by Sport-Related Concussion (SRC) and Non-SRC in Children Aged 5-7 (N=477)

**eTable 6.** Association Between Symptom Trajectories and Time Stratified by Sport-Related Concussion (SRC) and Non-SRC in Children Aged 8-12 (N=1,157)

**eTable 7.** Association Between Symptom Trajectories and Time Stratified by Sport Classification for Children Aged 5-7

**eTable 8.** Association Between Symptom Trajectories and Time Stratified by Sport Classification for Children Aged 8-12

**eTable 9.** Association between Persisting Symptoms After Concussion and Sport Classification for Children Aged 5-7

**eTable 10.** Contrasts for the Simple Effect of Sport Classification in the Association Between Persisting Symptoms After Concussion and Sport Classification for Children Aged 5-7

**eTable 11.** Association Between Persisting Symptoms After Concussion and Sport Classification for Children Aged 8-12

**eTable 12.** Contrasts for the Simple Effect of Sport Classification in the Association Between Persisting Symptoms After Concussion and Sport Classification for Children Aged 8-12

**eFigure 2.** Proportion of Persisting Symptoms After a Concussion ( $\geq 3$  Symptoms) Over Time With at Least 10 Patients in Each Sport

This supplemental material has been provided by the authors to give readers additional information about their work.

**eTable 1. Examples of Sport and Non-Sport Activities That Can Lead to Concussions**

| <b>Sport activities</b>                                                                                                                                                                                                                                                                                      | <b>Non-sport activities/falls</b>                                                                                                                                                                                                                                                                                                                               | <b>Excluded from this analysis</b>                                                                                                   |
|--------------------------------------------------------------------------------------------------------------------------------------------------------------------------------------------------------------------------------------------------------------------------------------------------------------|-----------------------------------------------------------------------------------------------------------------------------------------------------------------------------------------------------------------------------------------------------------------------------------------------------------------------------------------------------------------|--------------------------------------------------------------------------------------------------------------------------------------|
| <ul style="list-style-type: none"><li>• Football</li><li>• Soccer</li><li>• Basketball</li><li>• Cheerleading</li><li>• Track and field</li><li>• Dodgeball</li><li>• Kickball</li><li>• Recreational play/recess</li><li>• Tobogganing/sledding</li><li>• Snowboarding/skiing</li><li>• Bicycling</li></ul> | <ul style="list-style-type: none"><li>• Slipping on ice or wet surfaces</li><li>• Falling from stairs or furniture</li><li>• Tripping and falling while walking</li><li>• Bumping into doors, walls or furniture</li><li>• Walking into low-hanging objects</li><li>• Colliding accidentally with a person</li><li>• Dropping an object on their head</li></ul> | <ul style="list-style-type: none"><li>• MVC: Car, motorcycle, or ATV accidents</li><li>• Assaults or physical altercations</li></ul> |
| <p>* See eTable2 for list of sports included in the current study</p>                                                                                                                                                                                                                                        |                                                                                                                                                                                                                                                                                                                                                                 |                                                                                                                                      |

*Notes.* ATV=All-Terrain Vehicles; MVC=Motor Vehicle Crashes. These examples represent potential causes of sports and non-sports concussions. While they illustrate possible scenarios, they may not necessarily reflect the specific causes of concussions in the current study. This list is not exhaustive.

**eTable 2. Sport Classification**

| <b>Contact/Collision</b>                                                                                                                                                                                                                               | <b>Limited Contact/Impact</b>                                                                                                                                                                                                                                                                                                                                                                                                                                                                                                                                                                                                                          | <b>Non-contact</b>                                                                                                                                                                                                                                                                                                                                                                                              |
|--------------------------------------------------------------------------------------------------------------------------------------------------------------------------------------------------------------------------------------------------------|--------------------------------------------------------------------------------------------------------------------------------------------------------------------------------------------------------------------------------------------------------------------------------------------------------------------------------------------------------------------------------------------------------------------------------------------------------------------------------------------------------------------------------------------------------------------------------------------------------------------------------------------------------|-----------------------------------------------------------------------------------------------------------------------------------------------------------------------------------------------------------------------------------------------------------------------------------------------------------------------------------------------------------------------------------------------------------------|
| <ul style="list-style-type: none"><li>• Hockey</li><li>• Football</li><li>• Soccer</li><li>• Rugby</li><li>• Lacrosse</li><li>• Ringette</li><li>• Roller derby</li><li>• Combat sports (Karate, Judo, TKD, MMA, Boxing)</li><li>• Wrestling</li></ul> | <ul style="list-style-type: none"><li>• Bicycling</li><li>• Horseback riding</li><li>• Skateboarding/rollerblading</li><li>• Scooter</li><li>• Basketball</li><li>• Volleyball</li><li>• Baseball/softball</li><li>• Dodgeball</li><li>• Handball</li><li>• Tchuk ball</li><li>• Floor/street hockey</li><li>• Field hockey</li><li>• Trampoline</li><li>• Gymnastics</li><li>• Cheerleading</li><li>• Ski/snowboarding</li><li>• Skating</li><li>• Tobogganing/sledding</li><li>• Luge</li><li>• Skeleton</li><li>• Synchronized swimming</li><li>• Waterpolo</li><li>• Watersport (wakeboard)</li><li>• Parkour</li><li>• Ultimate Frisbee</li></ul> | <ul style="list-style-type: none"><li>• Recreational play (gym, recess)</li><li>• Swimming</li><li>• Badminton</li><li>• Tennis</li><li>• Flag football/touch</li><li>• Dance</li><li>• Curling</li><li>• Athletics/track</li><li>• Earth ball</li><li>• Rock climbing</li><li>• Hiking</li><li>• Sailing</li><li>• Bowling</li><li>• Golf</li><li>• Strength training</li><li>• Cross country skiing</li></ul> |

*Notes.* MMA=Mixed Martial Arts; TKD=Tae Kwon Do.

| <b>eTable 3. Missing PCSI Outcome at Each Time Point</b> |              |                         |                         |                       |                         |                         |
|----------------------------------------------------------|--------------|-------------------------|-------------------------|-----------------------|-------------------------|-------------------------|
| <b>Age group 5-7</b>                                     |              |                         |                         | <b>Age group 8-12</b> |                         |                         |
| <b>Week</b>                                              | <b>Total</b> | <b>Missing PCSI (N)</b> | <b>Missing PCSI (%)</b> | <b>Total</b>          | <b>Missing PCSI (N)</b> | <b>Missing PCSI (%)</b> |
| 0                                                        | 513          | 19                      | 3.70                    | 1234                  | 30                      | 2.43                    |
| 1                                                        | 513          | 72                      | 14.04                   | 1234                  | 174                     | 14.10                   |
| 2                                                        | 513          | 72                      | 14.04                   | 1234                  | 175                     | 14.18                   |
| 4                                                        | 513          | 85                      | 16.57                   | 1234                  | 183                     | 14.83                   |
| 8                                                        | 513          | 104                     | 20.27                   | 1234                  | 248                     | 20.10                   |
| 12                                                       | 513          | 128                     | 24.95                   | 1234                  | 308                     | 24.96                   |

*Notes.* PCSI=Post-Concussion Symptom Inventory

**eFigure1. Participant Inclusion Flowchart**

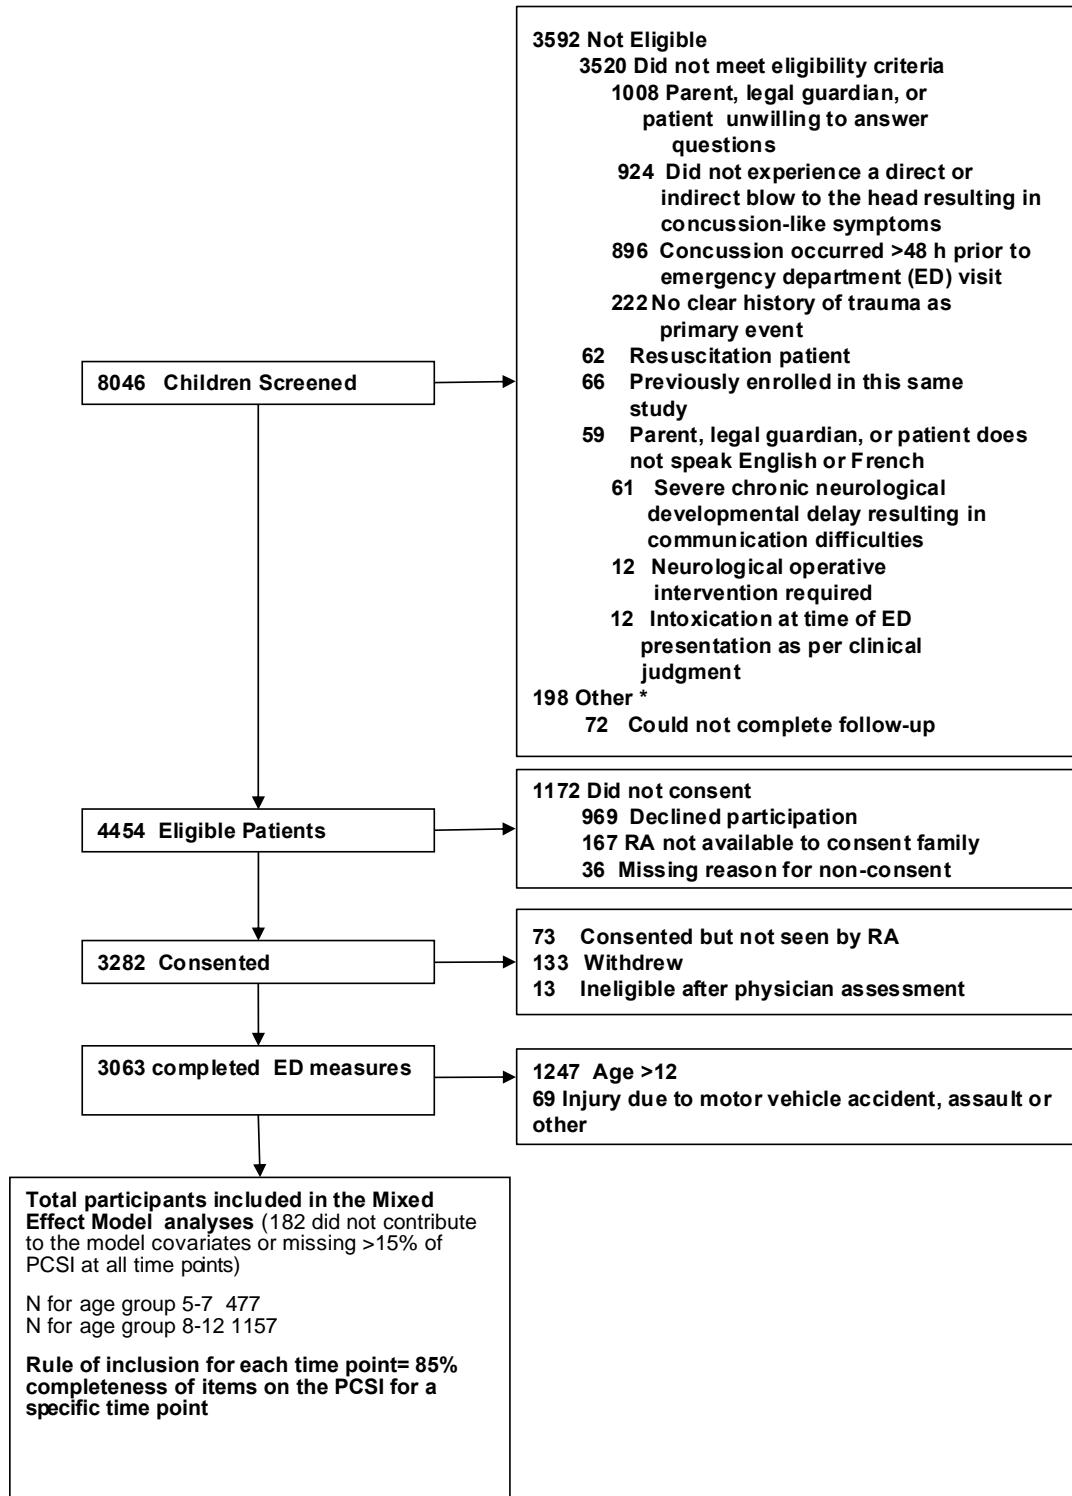

ED=Emergency Department; RA=Research Assistant; PCSI=Post-Concussion Symptom Inventory.

**eTable 4. Personal Characteristics by Type of Contact/Collision**

| Variable                                                    | Age 5-7 years          |                           |                     | Age 8-12 years                      |                            |                      |
|-------------------------------------------------------------|------------------------|---------------------------|---------------------|-------------------------------------|----------------------------|----------------------|
|                                                             | Non-Contact<br>N = 111 | Limited Contact<br>N = 44 | Collision<br>N = 52 | Non-Contact<br>N = 176 <sup>1</sup> | Limited Contact<br>N = 229 | Collision<br>N = 385 |
| <b>Age</b>                                                  | 6.67 (0.82)            | 6.48 (0.88)               | 6.86 (0.83)         | 10.32 (1.37)                        | 10.94<br>(1.48)            | 10.88<br>(1.33)      |
| <b>Sex</b>                                                  |                        |                           |                     |                                     |                            |                      |
| Male                                                        | 71 (64%)               | 27 (61%)                  | 44 (85%)            | 105 (60%)                           | 123 (54%)                  | 319 (83%)            |
| Female                                                      | 40 (36%)               | 17 (39%)                  | 8 (15%)             | 71 (40%)                            | 106 (46%)                  | 66 (17%)             |
| <b>Prior concussion and symptom duration</b>                |                        |                           |                     |                                     |                            |                      |
| No prior concussion; symptom duration <1 wk                 | 107 (96%)              | 43 (98%)                  | 51 (98%)            | 162 (92%)                           | 216 (94%)                  | 358 (93%)            |
| Prior concussion; symptom duration ≥1 wk                    | 4 (3.6%)               | 1 (2.3%)                  | 1 (1.9%)            | 14 (8.0%)                           | 13 (5.7%)                  | 27 (7.0%)            |
| <b>Personal history of migraine</b>                         | 7 (6.3%)               | 2 (4.5%)                  | 1 (1.9%)            | 12 (6.8%)                           | 25 (11%)                   | 39 (10%)             |
| <b>History of learning disability</b>                       | 4 (3.6%)               | 3 (6.8%)                  | 2 (3.8%)            | 15 (8.5%)                           | 20 (8.7%)                  | 22 (5.7%)            |
| <b>History of attention deficit disorder</b>                | 6 (5.4%)               | 6 (14%)                   | 2 (3.8%)            | 19 (11%)                            | 21 (9.2%)                  | 31 (8.1%)            |
| <b>History of anxiety</b>                                   | 1 (0.9%)               | 4 (9.1%)                  | 2 (3.8%)            | 16 (9.1%)                           | 16 (7.0%)                  | 17 (4.4%)            |
| <b>History of depression</b>                                | 0 (0%)                 | 0 (0%)                    | 0 (0%)              | 3 (1.7%)                            | 2 (0.9%)                   | 4 (1.0%)             |
| <b>Loss consciousness</b>                                   | 0.18 (0.84)            | 0.11 (0.43)               | 0.16 (0.80)         | 0.08 (0.43)                         | 0.14 (0.77)                | 0.04 (0.29)          |
| <b>Seizure following injury</b>                             | 2 (1.8%)               | 1 (2.3%)                  | 2 (3.8%)            | 2 (1.1%)                            | 4 (1.7%)                   | 8 (2.1%)             |
| <b>ACE - Appears dazed and confused</b>                     | 37 (33%)               | 24 (55%)                  | 20 (38%)            | 85 (48%)                            | 112 (49%)                  | 193 (50%)            |
| <b>ACE - Answers questions slowly</b>                       | 37 (33%)               | 14 (32%)                  | 20 (38%)            | 74 (42%)                            | 95 (41%)                   | 159 (41%)            |
| <b>ACE - Repeats questions</b>                              | 15 (14%)               | 2 (4.5%)                  | 7 (13%)             | 19 (11%)                            | 39 (17%)                   | 34 (8.8%)            |
| <b>ACE - Forgetful of recent information</b>                | 20 (18%)               | 5 (11%)                   | 5 (9.6%)            | 32 (18%)                            | 49 (21%)                   | 59 (15%)             |
| <b>Wore helmet</b>                                          | 0 (0%)                 | 12 (27%)                  | 14 (27%)            | 2 (1.1%)                            | 81 (35%)                   | 237 (62%)            |
| <b>Wore mouthguard</b>                                      | 2 (1.8%)               | 0 (0%)                    | 8 (15%)             | 2 (1.1%)                            | 3 (1.3%)                   | 140 (36%)            |
| <b>School days missed over past 6 months for any reason</b> | 1 (1)                  | 1 (1)                     | 1 (1)               | 1 (1)                               | 2 (1)                      | 1 (1)                |
| <b>Cognitive score from the Child-SCAT-3</b>                | 19.4 (5.5)             | 17.4 (6.6)                | 19.8 (4.9)          | 24.8 (3.5)                          | 24.8 (3.4)                 | 25.2 (3.0)           |
| <b>BESS tandem stance # errors</b>                          | 4.1 (3.6)              | 5.5 (3.6)                 | 5.0 (3.9)           | 3.5 (3.6)                           | 3.8 (3.7)                  | 3.9 (3.5)            |

**eTable 4. Personal Characteristics by Type of Contact/Collision**

| Variable                  | Age 5-7 years          |                           |                     | Age 8-12 years                      |                            |                      |
|---------------------------|------------------------|---------------------------|---------------------|-------------------------------------|----------------------------|----------------------|
|                           | Non-Contact<br>N = 111 | Limited Contact<br>N = 44 | Collision<br>N = 52 | Non-Contact<br>N = 176 <sup>1</sup> | Limited Contact<br>N = 229 | Collision<br>N = 385 |
| <b>Normal neck range</b>  | 89 (95%)               | 33 (94%)                  | 41 (93%)            | 153 (97%)                           | 193 (97%)                  | 330 (97%)            |
| NA                        | 17                     | 9                         | 8                   | 18                                  | 31                         | 45                   |
| <b>Tenderness of neck</b> | 12 (13%)               | 4 (11%)                   | 4 (9.1%)            | 27 (17%)                            | 42 (21%)                   | 78 (23%)             |
| NA                        | 17                     | 9                         | 8                   | 18                                  | 31                         | 47                   |

*Notes.* ACE=Acute Concussion Evaluation; BESS= Balance Error Scoring System; Child-SCAT-3= Child-Sport Concussion Assessment Tool-3.

**eTable 5. Association Between Symptom Trajectories and Time Stratified by Sport-Related Concussion (SRC) and Non-SRC in Children Aged 5-7 (N=477)**

| Characteristic                                              | Beta  | 95% CI <sup>1</sup> | p-value          |
|-------------------------------------------------------------|-------|---------------------|------------------|
| Type of injury                                              |       |                     | 0.4              |
| Non-sport/Fall                                              | —     | —                   |                  |
| Sports/Recreation                                           | 1.40  | -1.90, 4.70         | 0.4              |
| Age                                                         | 0.15  | -0.21, 0.51         | 0.4              |
| <b>Time</b>                                                 |       |                     | <b>&lt;0.001</b> |
| rcs(time, parms = my.knots)time                             | -2.10 | -2.30, -1.90        | <0.001           |
| rcs(time, parms = my.knots)time'                            | 6.20  | 5.60, 6.90          | <0.001           |
| Type of collision                                           |       |                     | 0.6              |
| Non-Contact                                                 | —     | —                   |                  |
| Limited Contact                                             | -0.05 | -0.90, 0.81         | >0.9             |
| Collision                                                   | -0.39 | -1.20, 0.40         | 0.3              |
| Prior concussion and symptom duration                       |       |                     | 0.2              |
| No prior concussion; symptom duration <1 week               | —     | —                   |                  |
| Prior concussion; symptom duration ≥1 week                  | 0.75  | -0.44, 1.90         | 0.2              |
| Personal history of migraine                                | 0.25  | -0.71, 1.20         | 0.6              |
| History of learning disability                              | -1.00 | -2.20, 0.15         | 0.09             |
| History of attention deficit disorder                       | 0.79  | -0.28, 1.80         | 0.15             |
| History of anxiety                                          | -0.43 | -1.80, 0.91         | 0.5              |
| Loss of consciousness duration                              | 0.03  | -0.36, 0.42         | 0.9              |
| Seizure following injury                                    | 0.25  | -1.30, 1.80         | 0.8              |
| <b>ACE - Appears dazed and confused</b>                     | 0.68  | 0.20, 1.20          | <b>0.01</b>      |
| ACE - Answers questions slowly                              | 0.41  | -0.08, 0.91         | 0.10             |
| ACE - Repeats questions                                     | 0.62  | -0.10, 1.30         | 0.09             |
| ACE - Forgetful of recent information                       | -0.06 | -0.66, 0.53         | 0.8              |
| Wore helmet                                                 | -0.39 | -1.50, 0.75         | 0.5              |
| Wore mouthguard                                             | -0.08 | -1.70, 1.60         | >0.9             |
| <b>School days missed over past 6 months for any reason</b> | 0.24  | 0.03, 0.45          | <b>0.03</b>      |
| Child-SCAT3                                                 | -0.01 | -0.05, 0.03         | 0.7              |
| <b>BESS tandem stance # errors</b>                          | 0.06  | 0.00, 0.11          | <b>0.04</b>      |
| Type of injury * Age                                        |       |                     | 0.5              |
| Sports/Recreation * Age                                     | -0.16 | -0.65, 0.33         | 0.5              |
| Type of injury * Time                                       |       |                     | 0.8              |
| Sports/Recreation * rcs(time, parms = my.knots)time         | 0.01  | -0.29, 0.30         | >0.9             |
| Sports/Recreation * rcs(time, parms = my.knots)time'        | -0.09 | -1.10, 0.92         | 0.9              |

Notes. ACE=Acute Concussion Evaluation; BESS=Balance Error Scoring System; CI=Confidence Interval; SCAT3= Sport Concussion Assessment Tool version 3. Bold denotes significance.



**eTable 6. Association Between Symptom Trajectories and Time Stratified by Sport-Related Concussion (SRC) and Non-SRC in Children Aged 8-12 (N=1,157)**

| Characteristic                                              | Beta         | 95% CI <sup>1</sup> | p-value          |
|-------------------------------------------------------------|--------------|---------------------|------------------|
| Type of injury                                              |              |                     | 0.3              |
| Non-sport/Fall                                              | —            | —                   |                  |
| Sports/Recreation                                           | -1.60        | -4.80, 1.70         | 0.3              |
| Age                                                         | 0.23         | -0.03, 0.49         | 0.087            |
| <b>Time</b>                                                 |              |                     | <b>&lt;0.001</b> |
| rcs(time, parms = my.knots)time                             | -2.6         | -2.8, -2.4          | <0.001           |
| rcs(time, parms = my.knots)time'                            | 15           | 14, 16              | <0.001           |
| Type of collision                                           |              |                     | 0.5              |
| Non-Contact                                                 | —            | —                   |                  |
| Limited Contact                                             | 0.17         | -0.51, 0.86         | 0.6              |
| Collision                                                   | -0.20        | -0.88, 0.49         | 0.6              |
| Prior concussion and symptom duration                       |              |                     | 0.06             |
| No prior concussion; symptom duration <1 wk                 | —            | —                   |                  |
| Prior concussion; symptom duration ≥1 wk                    | 0.73         | -0.03, 1.50         | 0.06             |
| Personal history of migraine                                | 0.36         | -0.27, 1.00         | 0.3              |
| History of learning disability                              | -0.50        | -1.30, 0.28         | 0.2              |
| History of attention deficit disorder                       | -0.17        | -0.90, 0.57         | 0.7              |
| <b>History of anxiety</b>                                   | 1.10         | 0.26, 1.90          | <b>0.01</b>      |
| History of depression                                       | -1.50        | -3.5, 0.54          | 0.2              |
| <b>Loss of consciousness duration</b>                       | 0.41         | 0.09, 0.73          | <b>0.01</b>      |
| Seizure following injury                                    | 1.40         | -0.14, 2.90         | 0.08             |
| <b>ACE - Appears dazed and confused</b>                     | 0.68         | 0.24, 1.10          | <b>0.002</b>     |
| <b>ACE - Answers questions slowly</b>                       | 0.78         | 0.33, 1.20          | <b>&lt;0.001</b> |
| <b>ACE - Repeats questions</b>                              | 0.79         | 0.14, 1.40          | <b>0.02</b>      |
| <b>ACE - Forgetful of recent information</b>                | 0.76         | 0.21, 1.30          | <b>0.007</b>     |
| Wore helmet                                                 | 0.06         | -0.54, 0.67         | 0.8              |
| Wore mouthguard                                             | -0.30        | -1.0, 0.44          | 0.4              |
| <b>School days missed over past 6 months for any reason</b> | <b>0.29</b>  | <b>0.09, 0.48</b>   | <b>0.004</b>     |
| <b>Child-SCAT3</b>                                          | <b>-0.08</b> | <b>-0.14, -0.02</b> | <b>0.008</b>     |
| <b>BESS tandem stance # errors</b>                          | <b>0.16</b>  | <b>0.10, 0.21</b>   | <b>&lt;0.001</b> |
| Type of injury * Age                                        |              |                     | 0.4              |
| Sports/Recreation * Age                                     | 0.14         | -0.17, 0.44         | 0.4              |
| Type of injury * Time                                       |              |                     | >0.9             |
| Sports/Recreation * rcs(time, parms = my.knots)time         | -0.01        | -0.23, 0.21         | >0.9             |
| Sports/Recreation * rcs(time, parms = my.knots)time'        | 0.11         | -1.50, 1.70         | 0.9              |

Notes. ACE=Acute Concussion Evaluation; BESS=Balance Error Scoring System; CI=Confidence Interval; SCAT3= Sport Concussion Assessment Tool version 3. Bold denotes significance.

**eTable 7. Association Between Symptom Trajectories and Time Stratified by Sport Classification for Children Aged 5-7**

| Characteristic                                       | N <sub>obs.</sub> | Beta  | 95% CI <sup>1</sup> | p-value          |
|------------------------------------------------------|-------------------|-------|---------------------|------------------|
| Age                                                  | 1,090             | -0.06 | -0.52, 0.39         | 0.8              |
| Type of collision                                    | 1,090             |       |                     | 0.6              |
| Non-Contact                                          |                   | —     | —                   |                  |
| Limited Contact                                      |                   | -0.50 | -1.70, 0.68         | 0.4              |
| Collision                                            |                   | -0.36 | -1.40, 0.73         | 0.5              |
| <b>Time</b>                                          | 1,090             |       |                     | <b>&lt;0.001</b> |
| rcs(time, parms = my.knots)time                      |                   | -2.0  | -2.30, -1.70        | <0.001           |
| rcs(time, parms = my.knots)time'                     |                   | 6.50  | 5.40, 7.50          | <0.001           |
| Prior concussion and symptom duration                | 1,090             |       |                     | 0.3              |
| No prior concussion; symptom duration <1 wk          |                   | —     | —                   |                  |
| Prior concussion; symptom duration ≥1 wk             |                   | 0.95  | -0.99, 2.90         | 0.3              |
| Personal history of migraine                         | 1,090             | 0.25  | -1.40, 1.90         | 0.8              |
| <b>History of learning disability</b>                | 1,090             | -1.90 | -3.70, -0.09        | <b>0.04</b>      |
| <b>History of attention deficit disorder</b>         | 1,090             | 1.50  | 0.01, 3.00          | <b>0.05</b>      |
| History of anxiety                                   | 1,090             | -0.43 | -2.30, 1.50         | 0.7              |
| Loss of consciousness duration                       | 1,090             | 0.07  | -0.37, 0.51         | 0.8              |
| Seizure following injury                             | 1,090             | 0.75  | -1.40, 2.90         | 0.5              |
| ACE - Appears dazed and confused                     | 1,090             | 0.49  | -0.33, 1.30         | 0.2              |
| <b>ACE - Answers questions slowly</b>                | 1,090             | 1.10  | 0.20, 1.90          | <b>0.02</b>      |
| ACE - Repeats questions                              | 1,090             | 1.00  | -0.09, 2.20         | 0.07             |
| ACE - Forgetful of recent information                | 1,090             | -0.63 | -1.70, 0.39         | 0.2              |
| Wore helmet                                          | 1,090             | -0.58 | -1.90, 0.68         | 0.4              |
| Wore mouthguard                                      | 1,090             | -0.08 | -1.90, 1.80         | >0.9             |
| School days missed over past 6 months for any reason | 1,090             | 0.24  | -0.12, 0.60         | 0.2              |
| Child-SCAT3                                          | 1,090             | 0.01  | -0.06, 0.08         | 0.7              |
| BESS tandem stance # errors                          | 1,090             | 0.04  | -0.05, 0.14         | 0.4              |
| Type of collision * Time                             | 1,090             |       |                     | 0.2              |
| Limited Contact * rcs(time, parms = my.knots)time    |                   | 0.36  | -0.17, 0.90         | 0.2              |
| Collision * rcs(time, parms = my.knots)time          |                   | -0.21 | -0.71, 0.29         | 0.4              |
| Limited Contact * rcs(time, parms = my.knots)time'   |                   | -1.20 | -3.20, 0.87         | 0.3              |
| Collision * rcs(time, parms = my.knots)time'         |                   | 1.10  | -0.85, 3.00         | 0.3              |

Notes. ACE=Acute Concussion Evaluation; BESS=Balance Error Scoring System; CI=Confidence Interval; SCAT3= Sport Concussion Assessment Tool version 3. Bold denotes significance.

**eTable 8. Association Between Symptom Trajectories and Time Stratified by Sport Classification for Children Aged 8-12**

| Characteristic                                              | N <sub>obs.</sub> | Beta  | 95% CI <sup>1</sup> | p-value          |
|-------------------------------------------------------------|-------------------|-------|---------------------|------------------|
| <b>Age</b>                                                  | 4,083             | 0.32  | 0.15, 0.50          | <b>&lt;0.001</b> |
| Type of collision                                           | 4,083             |       |                     | 0.5              |
| Non-Contact                                                 |                   | —     | —                   |                  |
| Limited Contact                                             |                   | 0.45  | -0.41, 1.30         | 0.3              |
| Collision                                                   |                   | 0.16  | -0.68, 0.99         | 0.7              |
| <b>Time</b>                                                 | 4,083             |       |                     | <b>&lt;0.001</b> |
| rcs(time, parms = my.knots)time                             |                   | -2.60 | -2.90, -2.40        | <0.001           |
| rcs(time, parms = my.knots)time'                            |                   | 16    | 14, 19              | <0.001           |
| <b>Prior concussion and symptom duration</b>                | 4,083             |       |                     | <b>0.02</b>      |
| No prior concussion; symptom duration <1 wk                 |                   | —     | —                   |                  |
| Prior concussion; symptom duration ≥1 wk                    |                   | 1.10  | 0.15, 2.00          | 0.02             |
| Personal history of migraine                                | 4,083             | -0.08 | -0.85, 0.70         | 0.8              |
| History of learning disability                              | 4,083             | 0.08  | -0.88, 1.00         | 0.9              |
| History of attention deficit disorder                       | 4,083             | -0.49 | -1.40, 0.38         | 0.3              |
| <b>History of anxiety</b>                                   | 4,083             | 1.60  | 0.59, 2.6           | <b>0.002</b>     |
| History of depression                                       | 4,083             | -0.19 | -2.50, 2.20         | 0.9              |
| Loss of consciousness duration                              | 4,083             | 0.41  | -0.13, 0.95         | 0.14             |
| Seizure following injury                                    | 4,083             | 1.70  | -0.07, 3.40         | 0.06             |
| <b>ACE - Appears dazed and confused</b>                     | 4,083             | 0.74  | 0.22, 1.30          | <b>0.006</b>     |
| <b>ACE - Answers questions slowly</b>                       | 4,083             | 0.68  | 0.14, 1.20          | 0.01             |
| ACE - Repeats questions                                     | 4,083             | 0.58  | -0.17, 1.30         | 0.13             |
| <b>ACE - Forgetful of recent information</b>                | 4,083             | 0.74  | 0.07, 1.40          | <b>0.03</b>      |
| Wore helmet                                                 | 4,083             | 0.00  | -0.60, 0.59         | >0.9             |
| Wore mouthguard                                             | 4,083             | -0.24 | -0.98, 0.50         | 0.5              |
| <b>School days missed over past 6 months for any reason</b> | 4,083             | 0.27  | 0.03, 0.51          | <b>0.03</b>      |
| Child-SCAT3                                                 | 4,083             | -0.04 | -0.12, 0.04         | 0.3              |
| <b>BESS tandem stance # errors</b>                          | 4,083             | 0.14  | 0.07, 0.21          | <b>&lt;0.001</b> |
| Type of collision * Time                                    | 4,083             |       |                     | 0.4              |
| Limited Contact * rcs(time, parms = my.knots)time           |                   | 0.03  | -0.33, 0.38         | 0.9              |
| Collision * rcs(time, parms = my.knots)time                 |                   | -0.06 | -0.39, 0.26         | 0.7              |
| Limited Contact * rcs(time, parms = my.knots)time'          |                   | -0.78 | -3.50, 2.00         | 0.6              |
| Collision * rcs(time, parms = my.knots)time'                |                   | -0.02 | -2.50, 2.50         | >0.9             |

Notes. ACE=Acute Concussion Evaluation; BESS=Balance Error Scoring System; CI=Confidence Interval; SCAT3= Sport Concussion Assessment Tool version 3. Bold denotes significance.

**eTable 9. Association between Persisting Symptoms After Concussion and Sport Classification for Children Aged 5-7**

| Characteristic           | N <sub>obs.</sub> | log(OR) | 95% CI       | p-value          |
|--------------------------|-------------------|---------|--------------|------------------|
| <b>Type of collision</b> |                   |         |              | <b>0.04</b>      |
| Non-Contact              | 1,687             | —       | —            |                  |
| Limited Contact          | 194               | 0.66    | -0.15, 1.5   |                  |
| Collision                | 222               | -0.74   | -1.6, 0.08   |                  |
| <b>Time</b>              | 2,103             | -0.17   | -0.21, -0.13 | <b>&lt;0.001</b> |

Notes. OR=Odds Ratio. CI=Confidence Interval. Bold denotes significance.

**eTable 10. Contrasts for the Simple Effect of Sport Classification in the Association Between Persisting Symptoms After Concussion and Sport Classification for Children Aged 5-7**

| Contrast                                   | Estimate | SE   | p-value     |
|--------------------------------------------|----------|------|-------------|
| (Non-Contact) – Limited Contact            | -0.66    | 0.41 | 0.25        |
| (Non-Contact) – Contact/Collision          | 0.74     | 0.42 | 0.18        |
| <b>Limited Contact – Contact/Collision</b> | 1.40     | 0.56 | <b>0.03</b> |

Notes. SE=Standard Error. Bold denotes significance after adjusting for multiple comparisons using the Tukey method.

**eTable 11. Association Between Persisting Symptoms After Concussion and Sport Classification for Children Aged 8-12**

| Characteristic           | N <sub>obs.</sub> | log(OR) | 95% CI       | p-value          |
|--------------------------|-------------------|---------|--------------|------------------|
| <b>Type of collision</b> |                   |         |              | <b>0.05</b>      |
| Non-Contact              | 2,379             | —       | —            |                  |
| Limited Contact          | 1,013             | 0.43    | -0.01, 0.86  |                  |
| Collision                | 1,670             | -0.15   | -0.52, 0.22  |                  |
| <b>Time</b>              | 5,062             | -0.27   | -0.30, -0.25 | <b>&lt;0.001</b> |

Notes. OR=Odds Ratio. CI=Confidence Interval. Bold denotes significance.

**eTable 12. Contrasts for the Simple Effect of Sport Classification in the Association Between Persisting Symptoms After Concussion and Sport Classification for Children Aged 8-12**

| Contrast                                   | Estimate | SE   | p-value     |
|--------------------------------------------|----------|------|-------------|
| (Non-Contact) – Limited Contact            | -0.43    | 0.22 | 0.13        |
| (Non-Contact) – Contact/Collision          | 0.15     | 0.19 | 0.71        |
| <b>Limited Contact – Contact/Collision</b> | 0.57     | 0.24 | <b>0.04</b> |

Notes. SE=Standard Error. Bold denotes significance after adjusting for multiple comparisons using the Tukey method.

**eFigure 2. Proportion of Persisting Symptoms After a Concussion ( $\geq 3$  Symptoms) Over Time With at Least 10 Patients in Each Sport**

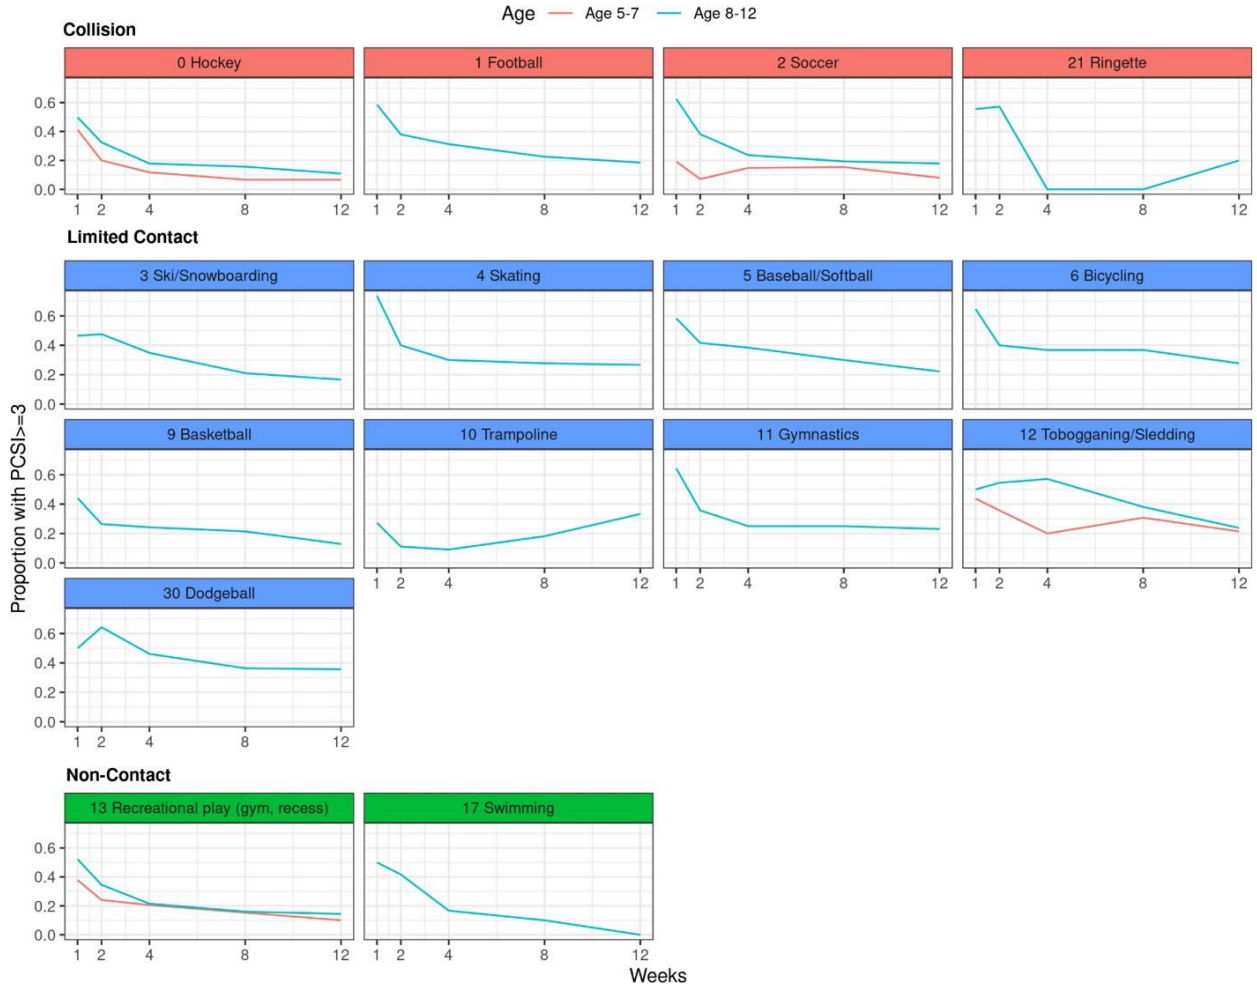

PCSI=Post-Concussion Symptom Inventory. Red indicates the 5-7 age group. Blue indicates the 8-12 age group.
