# Supplementary material for: Symptom Recovery in Children Aged 5 to 12 Years With Sport-Related and Non–Sport-Related Concussion
Source: PubMed Central journal article supplement (PMC11618468; doi:10.1001/jamanetworkopen.2024.48797), 2024-12-04
Supplement: jamanetwopen-e2448797-s002.pdf [file jamanetwopen-e2448797-s002.pdf]

## Data Sharing Statement

Ledoux. Symptom Recovery in Children Aged 5 to 12 Years With Sport-Related and Non-Sport-Related Concussion. *JAMA Netw Open*. Published December 04, 2024.  
doi:10.1001/jamanetworkopen.2024.48797

### Data

**Data available:** Yes

**Data types:** Deidentified participant data

**How to access data:** To obtain de-identified data please access the 5P: Predicting Persistent Postconcussive Problems in Pediatrics database via Brain-Code: <https://www.braincode.ca/>

**When available:** With publication

### Supporting Documents

**Document types:** None

### Additional Information

**Who can access the data:** To obtain de-identified data please access the 5P: Predicting Persistent Postconcussive Problems in Pediatrics database via Brain-Code: <https://www.braincode.ca/>

**Types of analyses:** To obtain de-identified data please access the 5P: Predicting Persistent Postconcussive Problems in Pediatrics database via Brain-Code: <https://www.braincode.ca/>

**Mechanisms of data availability:** To obtain de-identified data please access the 5P: Predicting Persistent Postconcussive Problems in Pediatrics database via Brain-Code: <https://www.braincode.ca/>
